# Supplementary material for: Polyhedral Oligomeric Sesquioxane Cross-Linked Chitosan-Based Multi-Effective Aerogel Preparation and Its Water-Driven Recovery Mechanism
Source: Gels. 2024 Apr 20;10(4):279. doi: 10.3390/gels10040279 (PMC11049377; doi:10.3390/gels10040279)
Supplement: Supplementary file 1 [file gels-10-00279-s001.zip]

Archive with 8 entries (8 files):
- gels-2953364-supplementary.pdf
- Video S1 .mp4
- Video S2 .mp4
- Video S3 .mp4
- Video S4 .mp4
- Video S5 .mp4
- Video S6 .mp4
- Video S7.mp4
